# Supplementary material for: Lipophilic M(α,α′-OC5H11)8phthalocyanines (M = H2and Ni(ii)): synthesis, electronic structure, and their utility for highly efficient carbonyl reductions
Source: Royal Society of Chemistry journal article supplement (doi:10.1039/c5dt03256c), 2015-01-01
Supplement: c5dt03256c1.pdf [file c5dt03256c1.pdf]

Supporting Information

**Lipophilic M( $\alpha,\alpha'$ -OC<sub>5</sub>H<sub>11</sub>)<sub>8</sub>Phthalocyanines (M = H<sub>2</sub> and Ni(II)): Synthesis, Electronic Structure, and its Utility for Applications on Highly Efficient Carbonyl Reduction**

Yu Jiang,<sup>a</sup> Minzhi Li,<sup>a</sup> Xu Liang,<sup>a\*</sup> John Mack,<sup>b\*</sup> Martin Wildervanck,<sup>b</sup> Tebello Nyokong,<sup>b</sup> Mingfeng Qin<sup>a</sup>, Weihua Zhu<sup>a\*</sup>

*School of Chemistry and Chemical Engineering, JiangSu University, Zhenjiang 213200, P. R. China.*

*Department of Chemistry, Rhodes University, Grahamstown 6140, South Africa.*

Corresponding author: Prof. Dr. Weihua Zhu, E-mail: [sayman@ujs.edu.cn](mailto:sayman@ujs.edu.cn), Tel: +86-511-8879-1928; Dr. Xu Liang, E-mail: [liangxu@126.com](mailto:liangxu@126.com), Tel: +86-511-8879-1928; Dr. John Mack: [j.mack@ru.ac.za](mailto:j.mack@ru.ac.za)

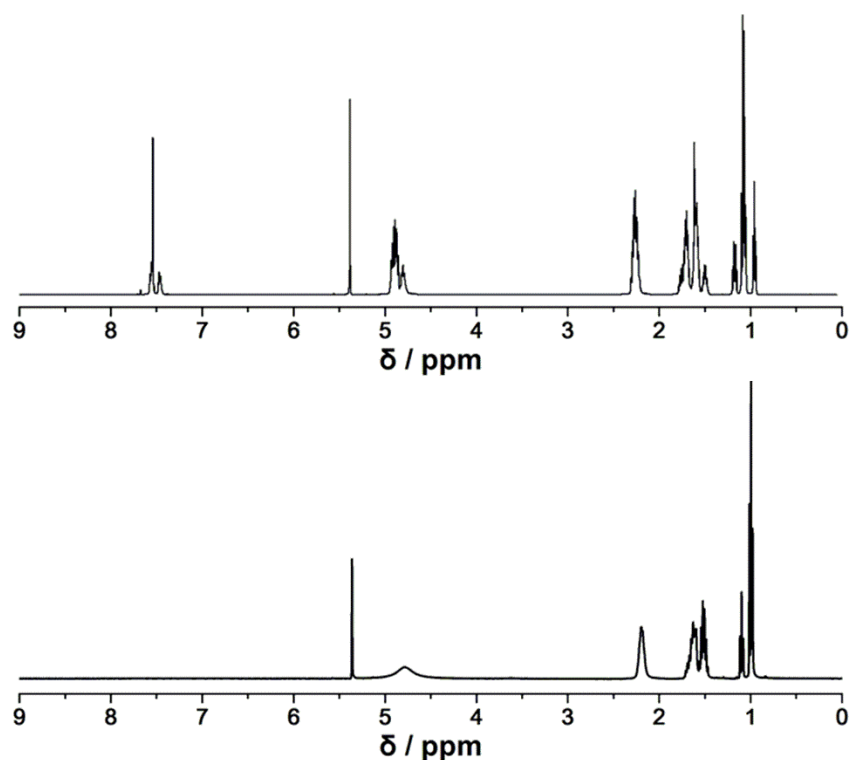

**Figure S1.** <sup>1</sup>H NMR spectra of H<sub>2</sub>-Pc **2** (up) and Ni(II)Pc **3a** (bottom) in CD<sub>2</sub>Cl<sub>2</sub>.

**Table S1.** TD-DFT spectra of the B3LYP optimized geometries of **2** and **3a** calculated with the CAM-B3LYP functional and 6-31G(d) basis sets.

| <b>2</b>          |                |                   |     |        |                  |     |                             |
|-------------------|----------------|-------------------|-----|--------|------------------|-----|-----------------------------|
| Band <sup>a</sup> | # <sup>b</sup> | Calc <sup>c</sup> |     |        | Exp <sup>d</sup> |     | Wavefunction= <sup>e</sup>  |
| --                | 1              | ---               | --- | ---    | ---              | --- | Ground state                |
| Q                 | 2              | 14.9              | 669 | (0.60) | 12.9             | 778 | 95% a → -s; 4% s → -a; ...  |
| Q                 | 3              | 15.4              | 651 | (0.46) | 13.7             | 730 | 89% a → -a; 10% s → -s; ... |

|    |    |      |     |        |      |     |                                                                                                                                                                                       |
|----|----|------|-----|--------|------|-----|---------------------------------------------------------------------------------------------------------------------------------------------------------------------------------------|
| B1 | 8  | 26.6 | 376 | (0.26) | 23.4 | 428 | 50% H $\pi$ 3 (1b <sub>1u</sub> ) → -s; 17% s → -a; ...                                                                                                                               |
| B1 | 13 | 29.4 | 340 | (0.02) | 24.7 | 405 | 68% H $\pi$ 3 (1b <sub>1u</sub> ) → -s; 13% H $\pi$ 2 (1e <sub>g</sub> ) → -a; ...                                                                                                    |
| B2 | 21 | 33.5 | 299 | (0.26) | 29.9 | 334 | 40% s → -a; 27% H $\pi$ 5 (2a <sub>1u</sub> ) → -s; 19% H $\pi$ 6 <sup>N</sup> (1b <sub>2g</sub> <sup>N</sup> ) → -s; ...                                                             |
| B2 | 23 | 34.5 | 290 | (0.15) | 32.7 | 306 | 19% H $\pi$ 16 → -s; 16% H $\pi$ 5 (2a <sub>1u</sub> ) → -a; 13% H $\pi$ 8 (2a <sub>2u</sub> ) → -s; 10% H $\pi$ 6 <sup>N</sup> (1b <sub>2g</sub> <sup>N</sup> ) → -s; 8% s → -s; ... |

### 3a

| Band <sup>a</sup> | # <sup>b</sup> | Calc <sup>c</sup> |     |        | Exp <sup>d</sup> |     | Wavefunction= <sup>e</sup>                                                                    |
|-------------------|----------------|-------------------|-----|--------|------------------|-----|-----------------------------------------------------------------------------------------------|
| --                | 1              | ---               | --- | ---    | ---              | --- | Ground state                                                                                  |
| Q                 | 2              | 14.8              | 675 | (0.51) | 13.3             | 754 | 95% a → -s; 3% s → -a; ...                                                                    |
| Q                 | 3              | 15.3              | 654 | (0.47) | 13.7             | 731 | 95% a → -a; 4% s → -s; ...                                                                    |
| B1                | 23             | 31.7              | 315 | (0.24) | 29.7             | 337 | 25% s → -s; 16% d <sub>z2</sub> → -s; 12% H $\pi$ 5 (2e <sub>g</sub> ) → -a; ...              |
| B1                | 23             | 32.0              | 313 | (0.19) | 30.6             | 327 | 27% s → -a; 17% H $\pi$ 9 (3e <sub>g</sub> ) → -s; 15% H $\pi$ 4 (2a <sub>1u</sub> ) → s; ... |

a – Band assignment described in the text. b – The number of the state assigned in terms of ascending energy within the TD-DFT calculation. c – Calculated band energies (10<sup>3</sup>.cm<sup>-1</sup>), wavelengths (nm) and oscillator strengths in parentheses (f). d – Observed energies (10<sup>3</sup>.cm<sup>-1</sup>) and wavelengths (nm) in **Figure 1**. e – The wave functions based on the eigenvectors predicted by TD-DFT. One-electron transitions associated with Michl’s perimeter model are highlighted in bold. H and L refer to the HOMO and LUMO, respectively, while N refers to  $\pi$ -MOs associated primarily with the lone pairs of the aza-nitrogens, and A and B refer to the  $\pi$ - and  $\pi$ -spin electrons. When the H and L nomenclature is used the symmetry label for the corresponding MO in the  $\pi$ -systems of D<sub>4h</sub> MPC complexes is provided in parentheses where applicable.
